# Supplementary material for: Correlation of single nucleotide polymorphisms in the pregnancy-associated plasma protein-A gene with carotid plaques
Source: PubMed Central journal article supplement (PMC4485363; doi:10.1186/s12872-015-0041-1), 2015-06-30
Supplement: 12872_2015_41_MOESM1_ESM.pdf [file 12872_2015_41_MOESM1_ESM.pdf]

Additional table S1 Primer and probe sequence and PCR and LDR product length of *PAPP-A* variants

| Variant           | Primer or Probe                                           | Sequence(5'-3')                                                      | PCR or LDR length |
|-------------------|-----------------------------------------------------------|----------------------------------------------------------------------|-------------------|
| rs3747823<br>G/A  | rs3747823-up                                              | CAAAGCAAGCAAATGTGAA                                                  | 159               |
|                   | rs3747823-low                                             | ATGGCTGGACATGGAAAAGT                                                 |                   |
|                   | rs3747823_modify                                          | P-TTCTTCATCTTCAAATGAGATTTCTTTTTTT<br>TTTTTTTTTTTTTTTTTGCATCACTCA-FAM |                   |
|                   | rs3747823-A                                               | TTTTTTTTTTTTTTTTTCTCTGTCTGAGTCTCT<br>GT                              | 150               |
| rs3747823-G       | TTTTTTTTTTTTTTTTTCTCTGTCTGAGTCT<br>CTGC                   | 152                                                                  |                   |
| rs7020782<br>A/C  | rs7020782-up                                              | GCACTTCGCATGTGAGAAAA                                                 | 186               |
|                   | rs7020782-low                                             | GAGCTCAGCACCTGCACATA                                                 |                   |
|                   | rs7020782_modify                                          | P-AAGCATTCTCCACAGCCAGCTCTGGTTTTTT<br>TTTTTTTTTTTTTTTTTGCATCACTCA-FAM |                   |
|                   | rs7020782-A                                               | TTTTTTTTTTTTTTTTTTTTTTTTTTTGCCTCGCT<br>GCTGGAGCAATTGAGAT             | 165               |
| rs7020782-C       | TTTTTTTTTTTTTTTTTTTTTTTTTTTGCCTCG<br>CTGCTGGAGCAATTGAGAG  | 167                                                                  |                   |
| rs13290387<br>G/C | rs13290387-up                                             | GGGAGAATCCTGGTGCAGTA                                                 | 249               |
|                   | rs13290387-low                                            | AAATGGATGAGCGCTTGACT                                                 |                   |
|                   | rs13290387_modify                                         | P-AAAGACCCATAAAAATAAAAACCTTTTTT<br>TTTTTTTTTTTTTTTTTGCATCACTCA-FAM   |                   |
|                   | rs13290387-C                                              | TTTTTTTTTTTTTTTTTTTTTTTTTTTGTIAC<br>TCAAATGAAATGATACATGGG            | 170               |
| rs13290387-G      | TTTTTTTTTTTTTTTTTTTTTTTTTTTGTI<br>ACTCAAATGAAATGATACATGGC | 172                                                                  |                   |

PCR, polymerase chain reaction; LDR, ligase detection reaction
